# Supplementary material
Source: Elsevier journal article supplement (https://www.sciencedirect.com/science/article/pii/S1885585720304886)
Supplement: mmc1 [file S1885585720304886:mmc1.pdf]

SUPPLEMENTARY DATA

Figure 1 of the supplementary data.

Patient flowchart

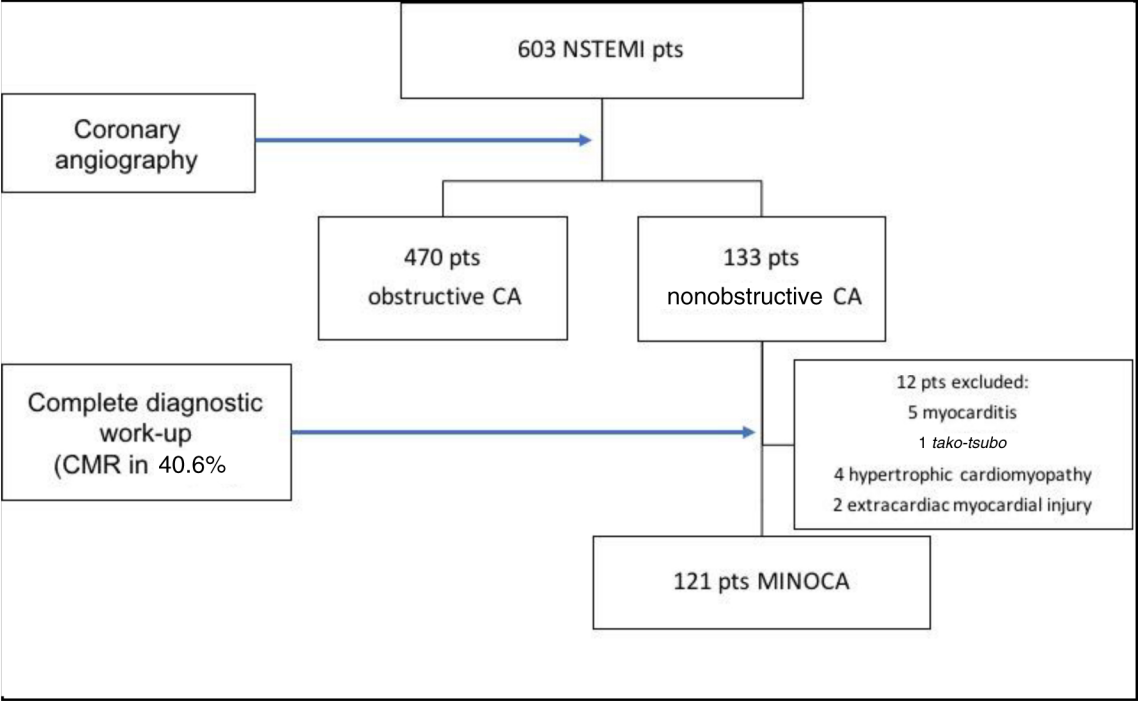

NSTEMI, non–ST-segment elevation myocardial infarction; pts, patients; CA, coronary arteries; CMR, cardiac magnetic resonance; MINOCA, myocardial infarction with non-obstructive coronary arteries.
